# Supplementary material for: Infants born large-for-gestational-age display slower growth in early infancy, but no epigenetic changes at birth
Source: PubMed Central journal article supplement (PMC4588582; doi:10.1038/srep14540), 2015-09-30

## **Infants born large-for-gestational-age display slower growth in early infancy, but no epigenetic changes at birth**

Valentina Chiavaroli<sup>1,\*</sup>, Wayne S Cutfield<sup>1</sup>, José G B Derraik<sup>1</sup>, Pan Zengxiang<sup>1</sup>, Sherry Ngo<sup>1</sup>, Allan Sheppard<sup>1</sup>, Susan Craigie<sup>1</sup>, Peter Stone<sup>3</sup>, Lynn Sadler<sup>4</sup>, Fredrik Ahlsson<sup>1,2</sup>

### **Supplementary Figure Legends**

**Supplementary Figure 1.** Summary of study's recruitment, with number of participants assessed at each time point.

**Supplementary Figure 2.** Output for RnBeads method, showing scatter (left) and volcano (right) plots for different methylation sites in AGA and LGA infants. In the scatter plot, x-axis and y-axis represent the mean  $\beta$ -values for AGA and LGA infants, respectively. In the volcano plot, x-axis shows the absolute difference in methylation (expressed as a ratio) for each CpG site, while the y-axis shows the  $-\log_{10}$  of the p-value for the methylation difference at each CpG site between AGA and LGA infants. Red color would indicate a statistically significant difference (adjusted  $p < 0.05$ ), but the absence of red points in both scatter and volcano plots shows that no statistically significant associations were observed.

**Supplementary Figure 1.**

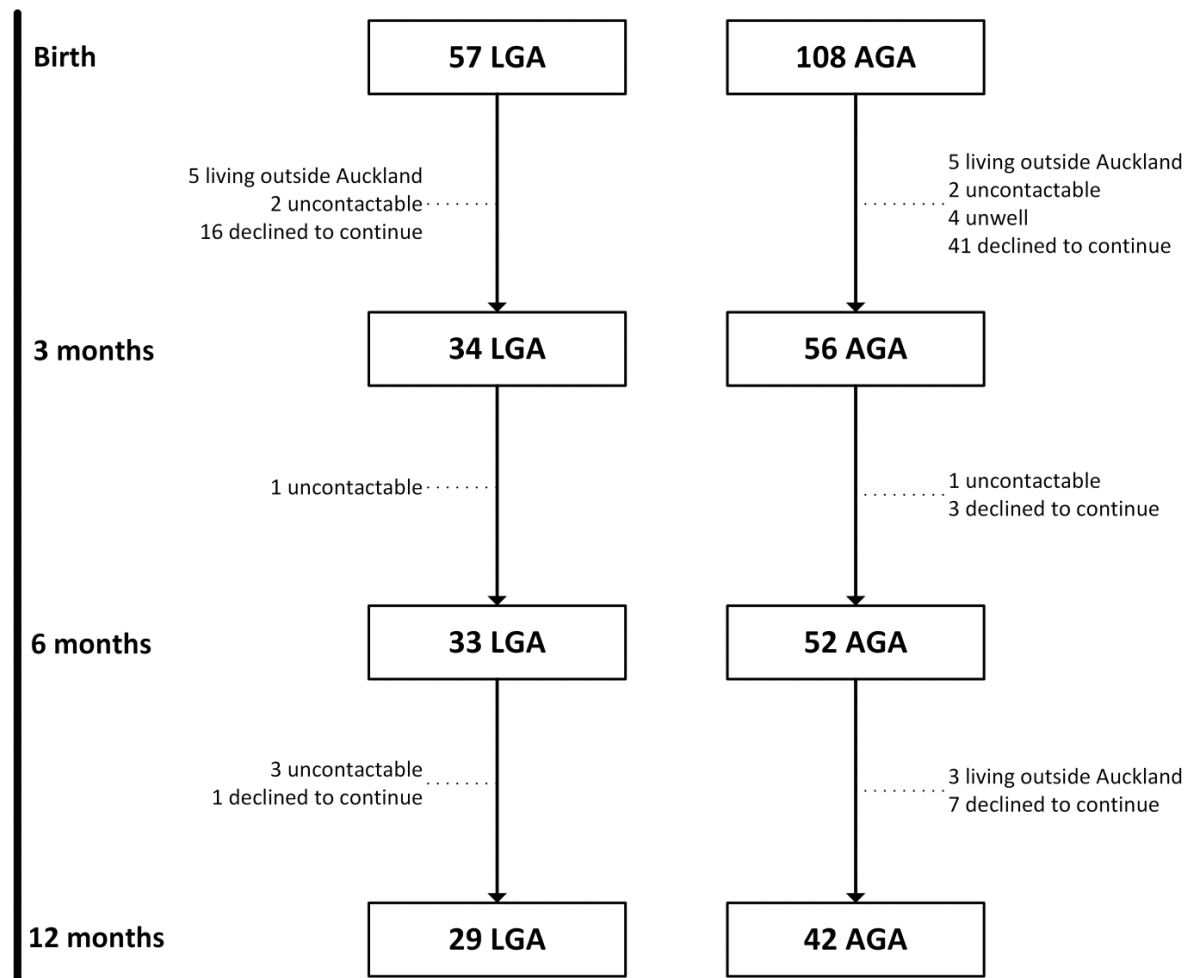

Supplementary Figure 2.

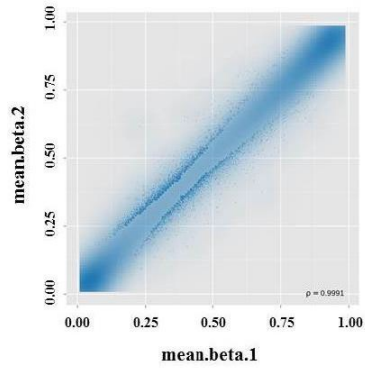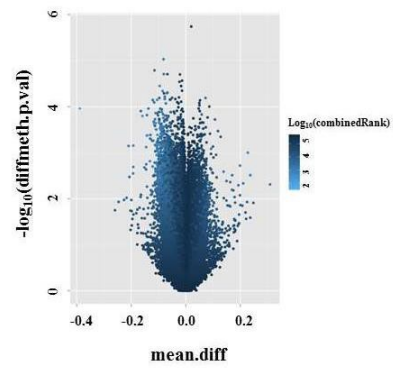

Supplement: srep14540-s1.pdf [file srep14540-s1.pdf]
